# Supplementary material for: Efficient Synthesis of High-Performance Anion Exchange Membranes by Applying Clickable Tetrakis(dialkylamino)phosphonium Cations
Source: MDPI journal article supplement (doi:10.3390/polym15020352), 2023-01-09
Supplement: s1 [file s1]

## **Supporting Information:**

**An efficient synthesis of high-performance anion  
exchange membranes by applying clickable  
tetrakis(dialkylamino)phosphonium cations**

## Characterization results

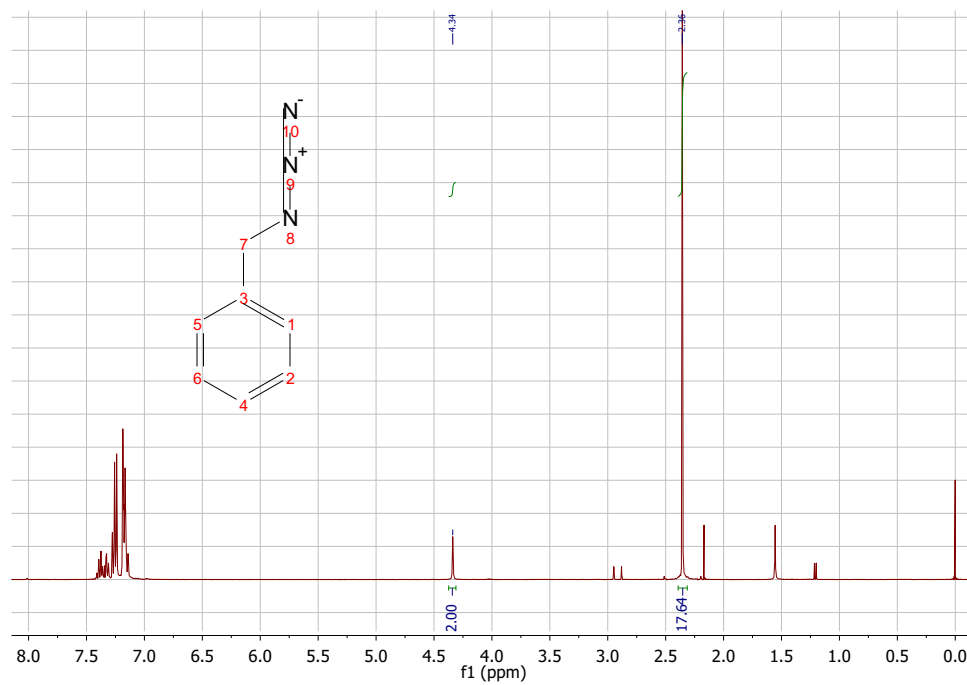

Figure S1:  $^1\text{H}$  NMR (400 MHz,  $\text{CDCl}_3$ ) spectra of benzyl azide solution in toluene.

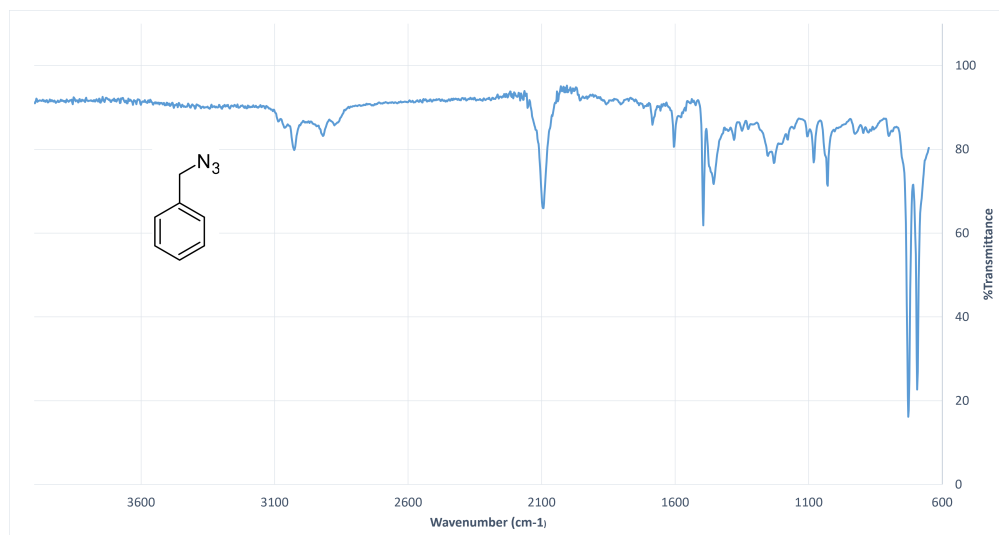

Figure S2: FTIR spectra of benzyl azide solution in toluene.

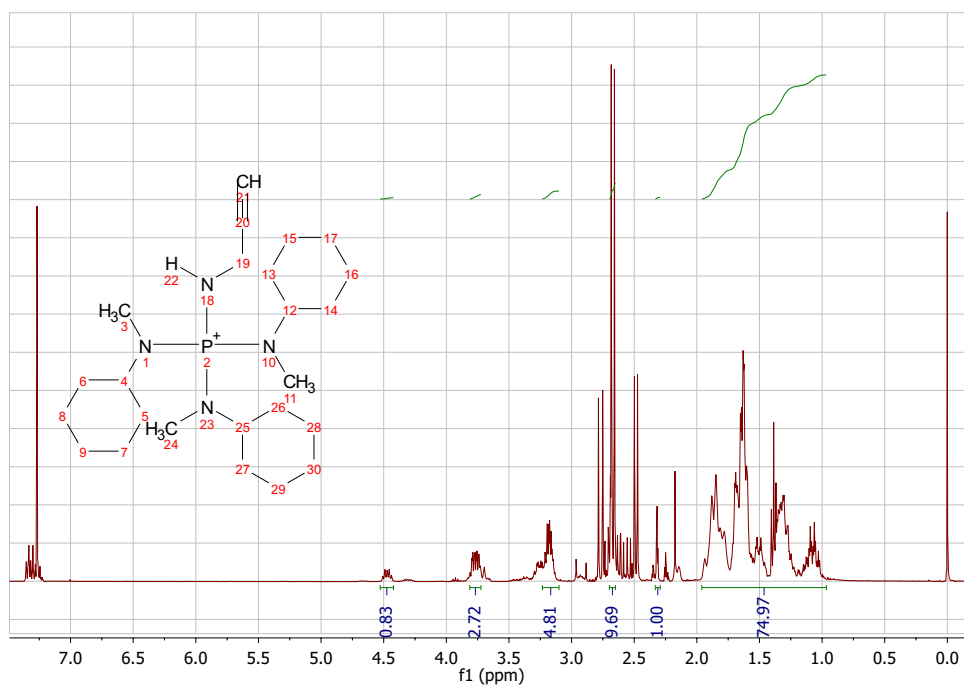

Figure S3:  $^1\text{H}$  NMR (400 MHz,  $\text{CDCl}_3$ ) spectra of compound **1'**.

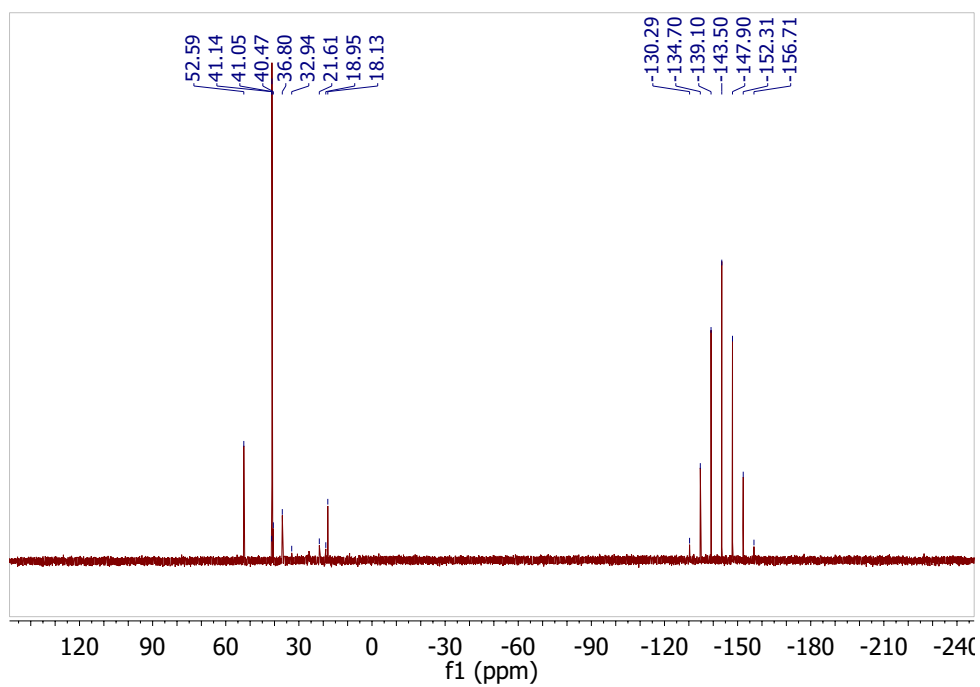

Figure S4:  $^{31}\text{P}$  NMR (162 MHz,  $\text{CDCl}_3$ ) spectra of compound **1'**.

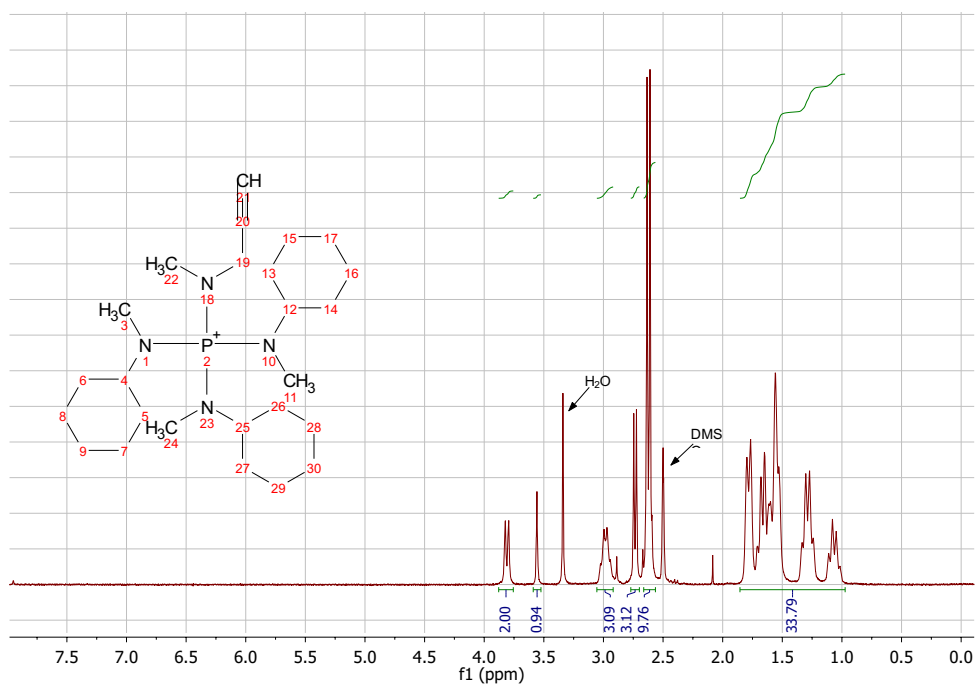

Figure S5:  $^1\text{H}$  NMR (400 MHz,  $\text{DMSO}-d_6$ ) spectra of compound **1**.

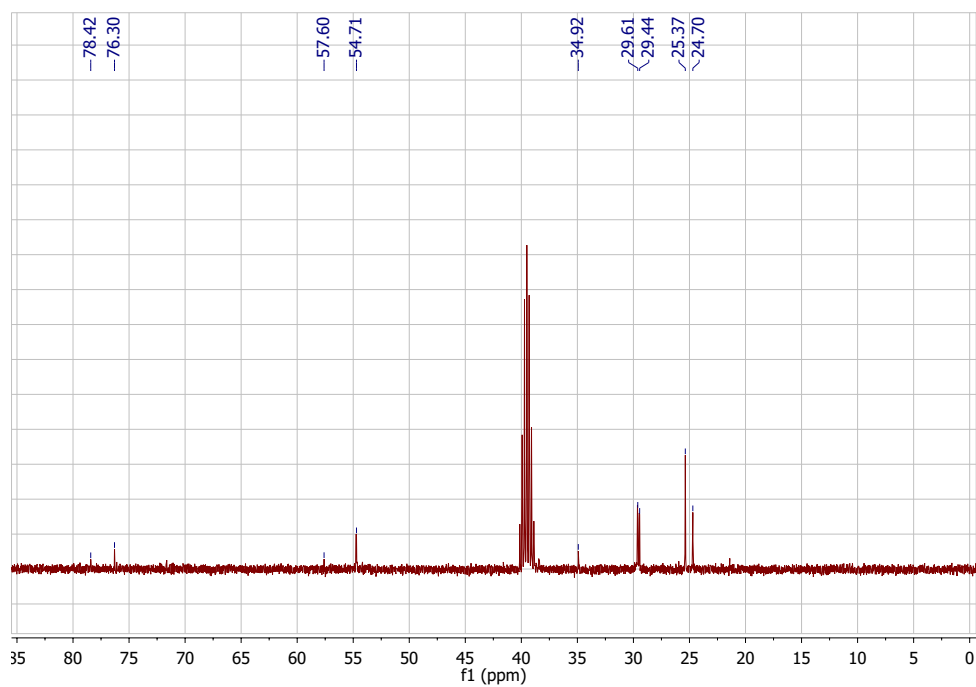

Figure S6: <sup>13</sup>C NMR (101 MHz, DMSO-*d*<sub>6</sub>) spectra of compound **1**.

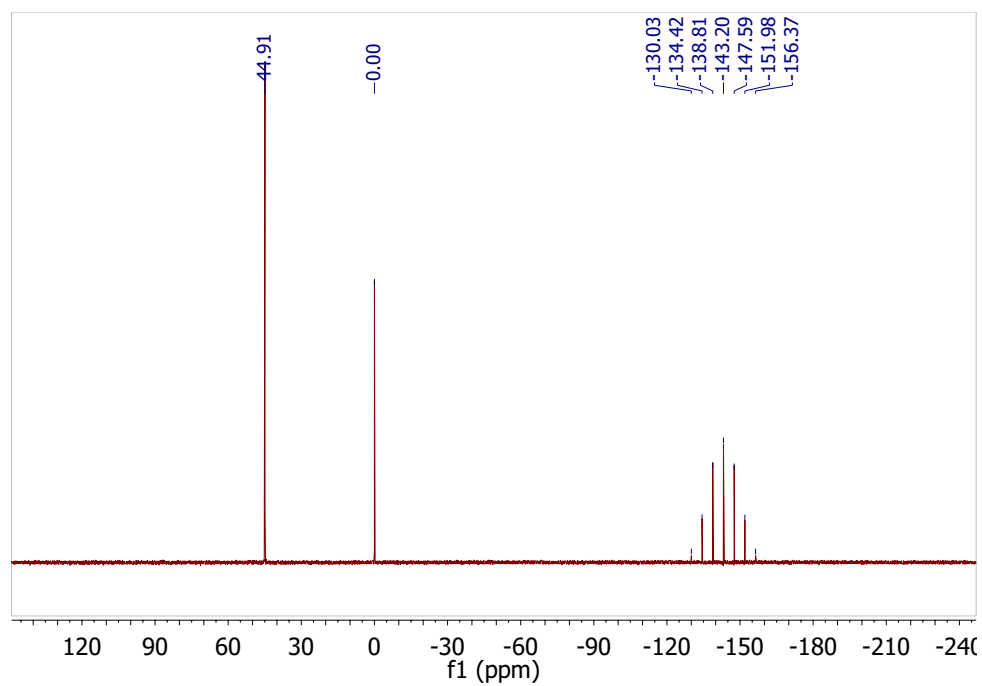

Figure S7: <sup>31</sup>P NMR (162 MHz, DMSO-*d*<sub>6</sub>) spectra of compound **1**.

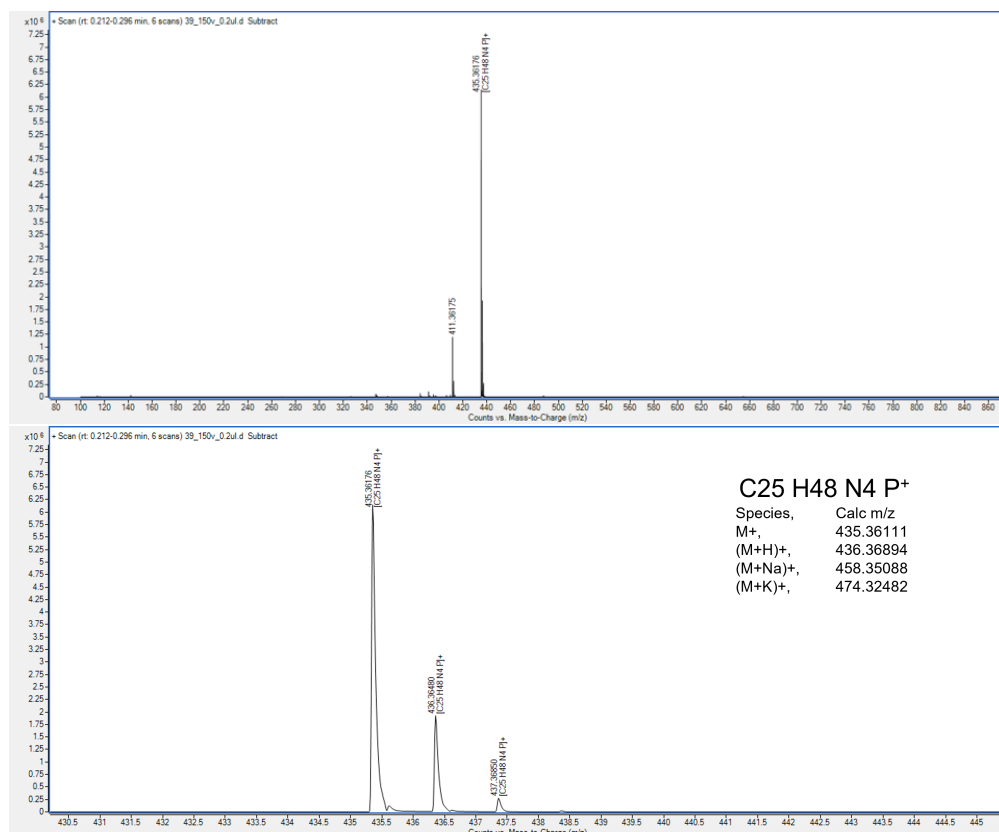

Figure S8: MS spectra of compound **1**.

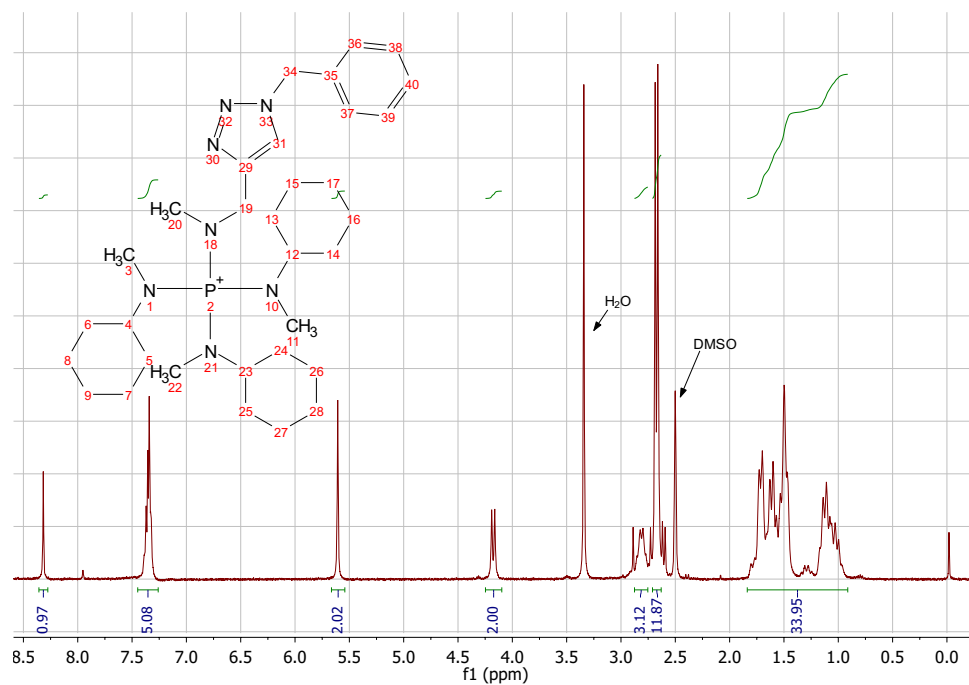

Figure S9: <sup>1</sup>H NMR (400 MHz, DMSO-*d*<sub>6</sub>) spectra of compound **1a**.

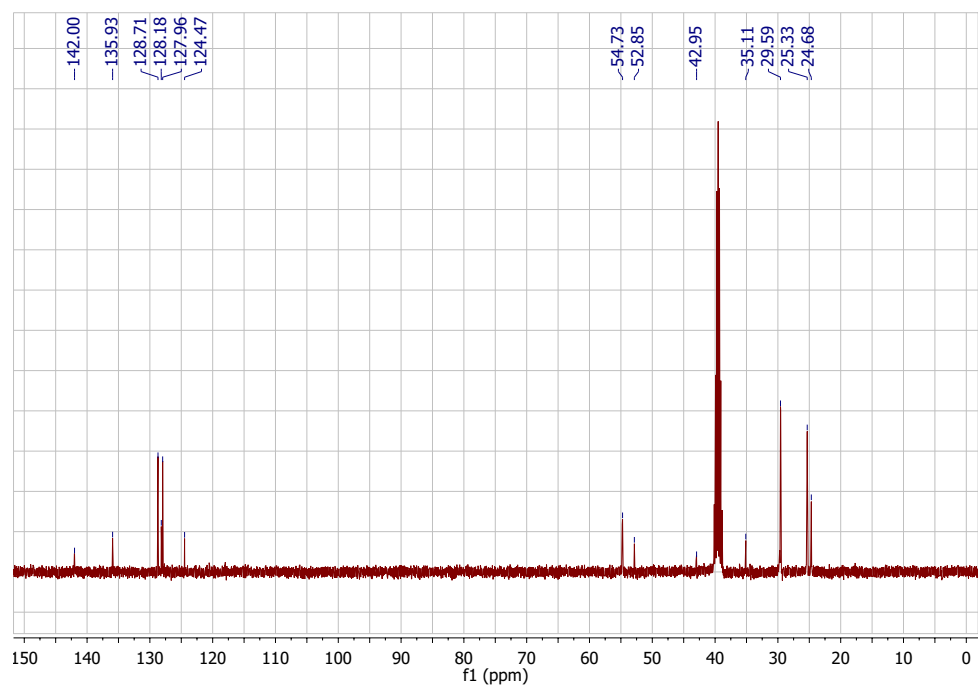

Figure S10: <sup>13</sup>C NMR (101 MHz, DMSO-*d*<sub>6</sub>) spectra of compound **1a**.

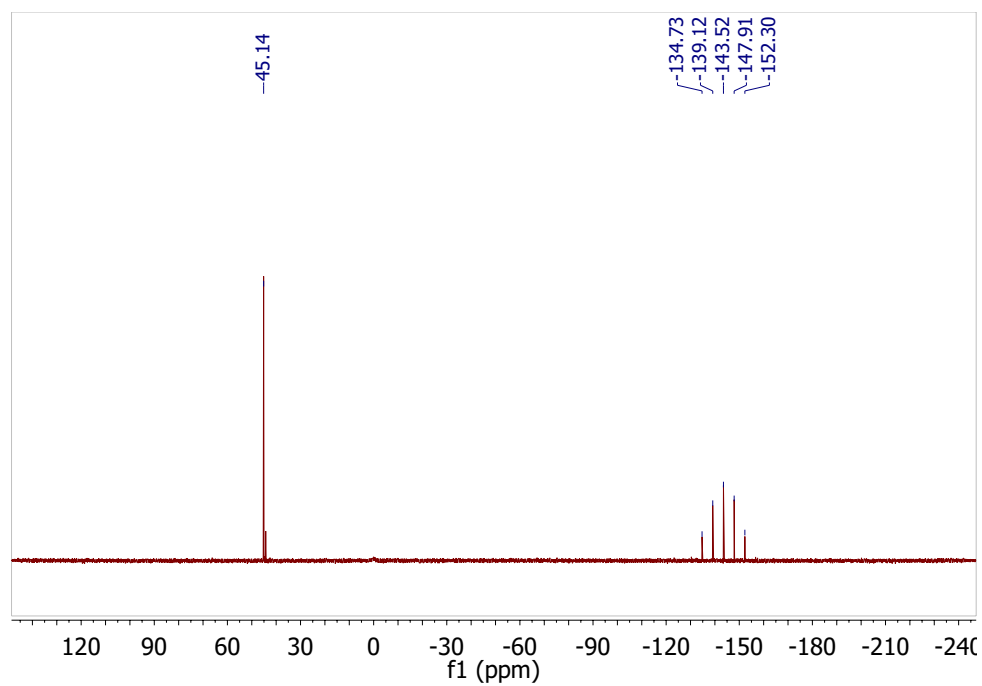

Figure S11: <sup>31</sup>P NMR (162 MHz, DMSO-*d*<sub>6</sub>) spectra of compound **1a**.

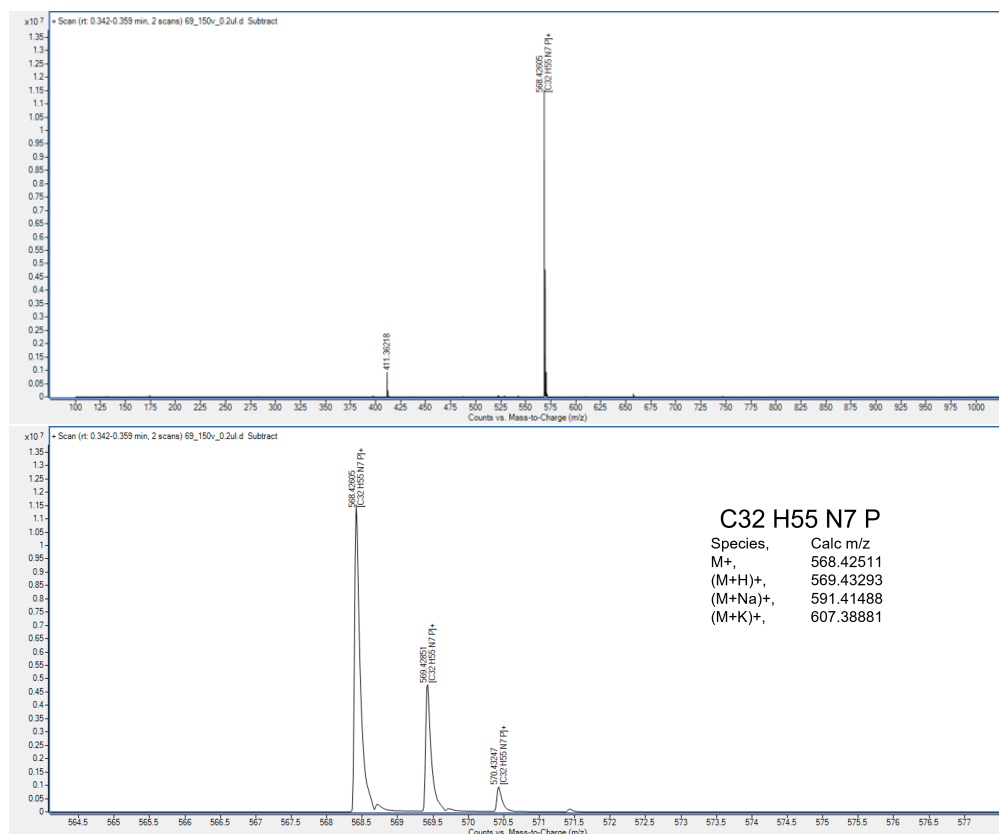

Figure S12: MS spectra of compound **1a**.

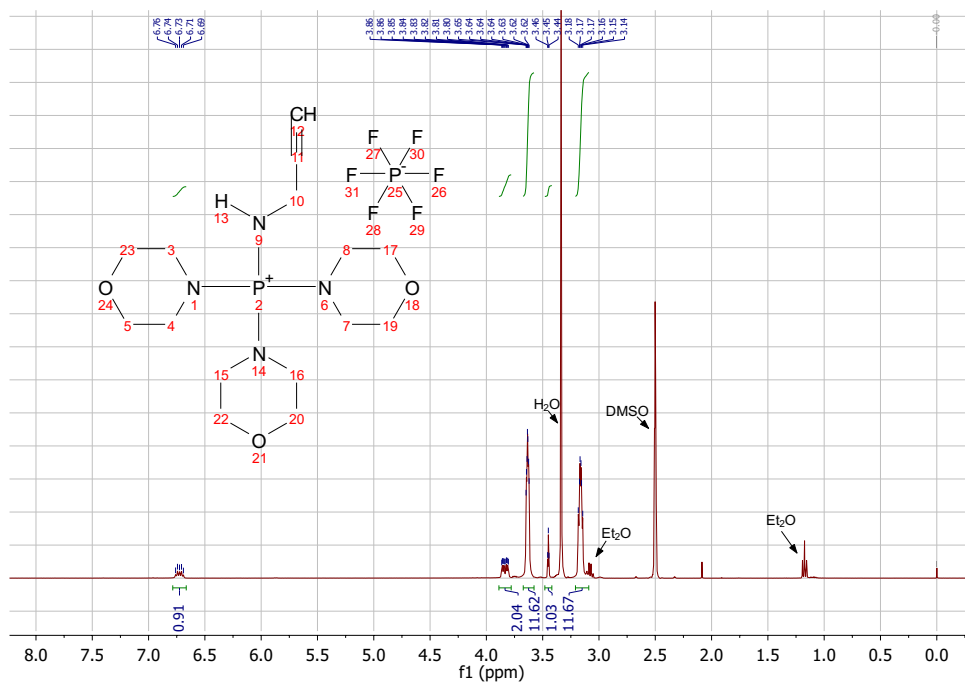

Figure S13: <sup>1</sup>H NMR (400 MHz, DMSO-*d*<sub>6</sub>) spectra of compound **2'**.



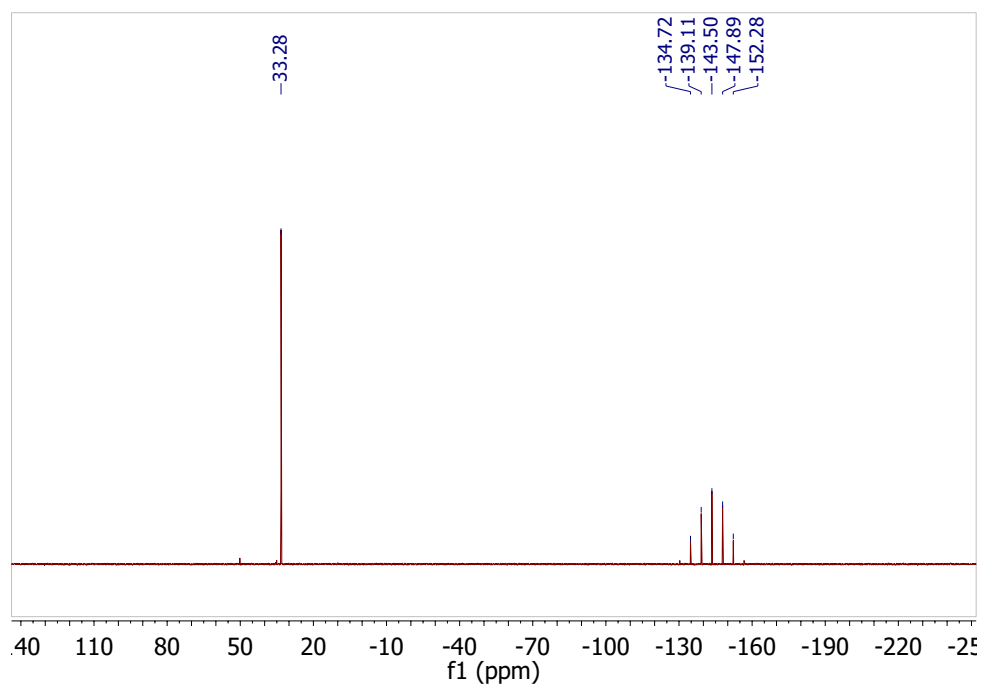

Figure S14:  $^{31}\text{P}$  NMR (162 MHz,  $\text{DMSO}-d_6$ ) spectra of compound **2'**.

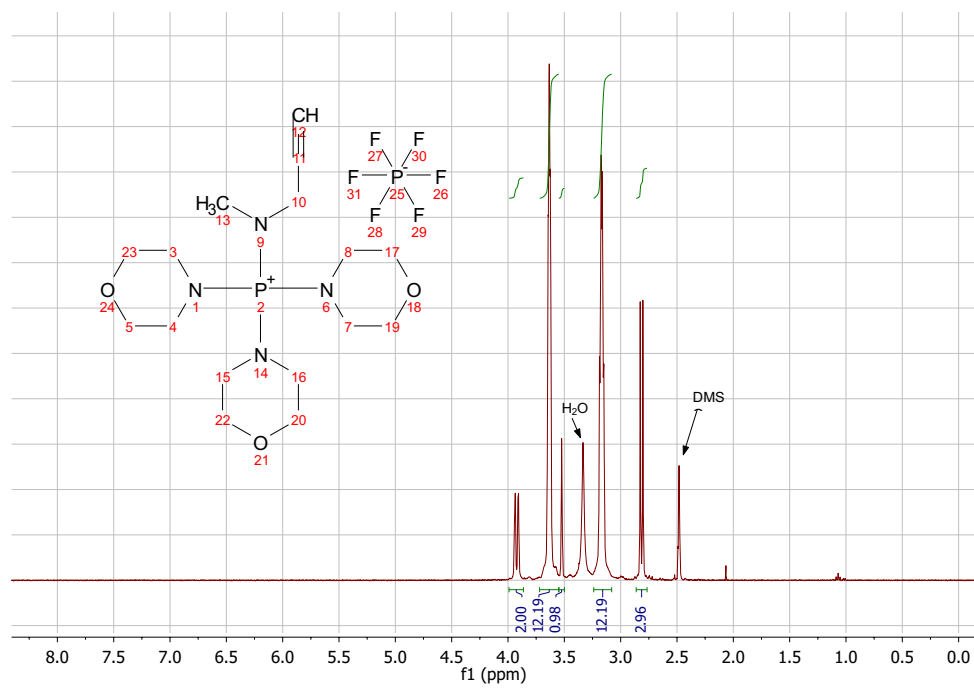

Figure S15:  $^1\text{H}$  NMR (400 MHz,  $\text{DMSO}-d_6$ ) spectra of compound **2**.

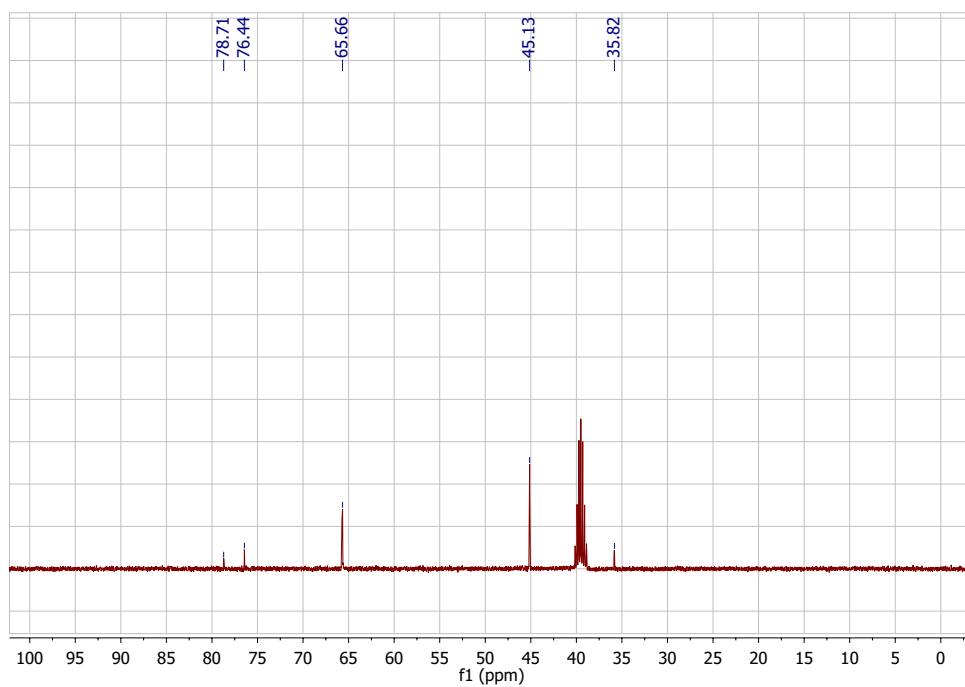

Figure S16:  $^{13}\text{C}$  NMR (101 MHz,  $\text{DMSO-}d_6$ ) spectra of compound **2**.

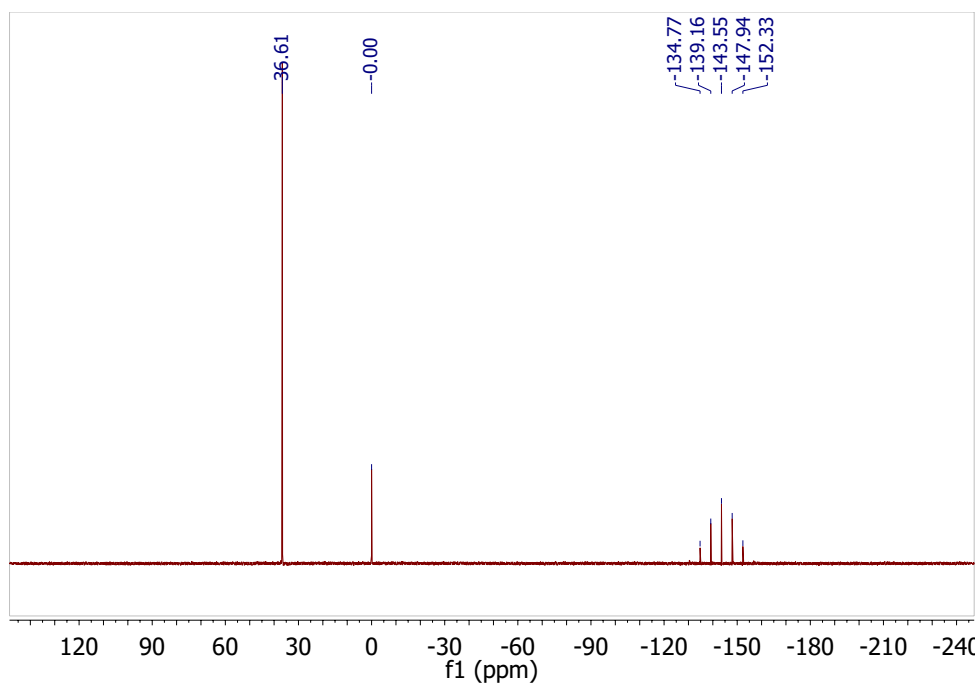

Figure S17:  $^{31}\text{P}$  NMR (162 MHz,  $\text{DMSO-}d_6$ ) spectra of compound **2**.

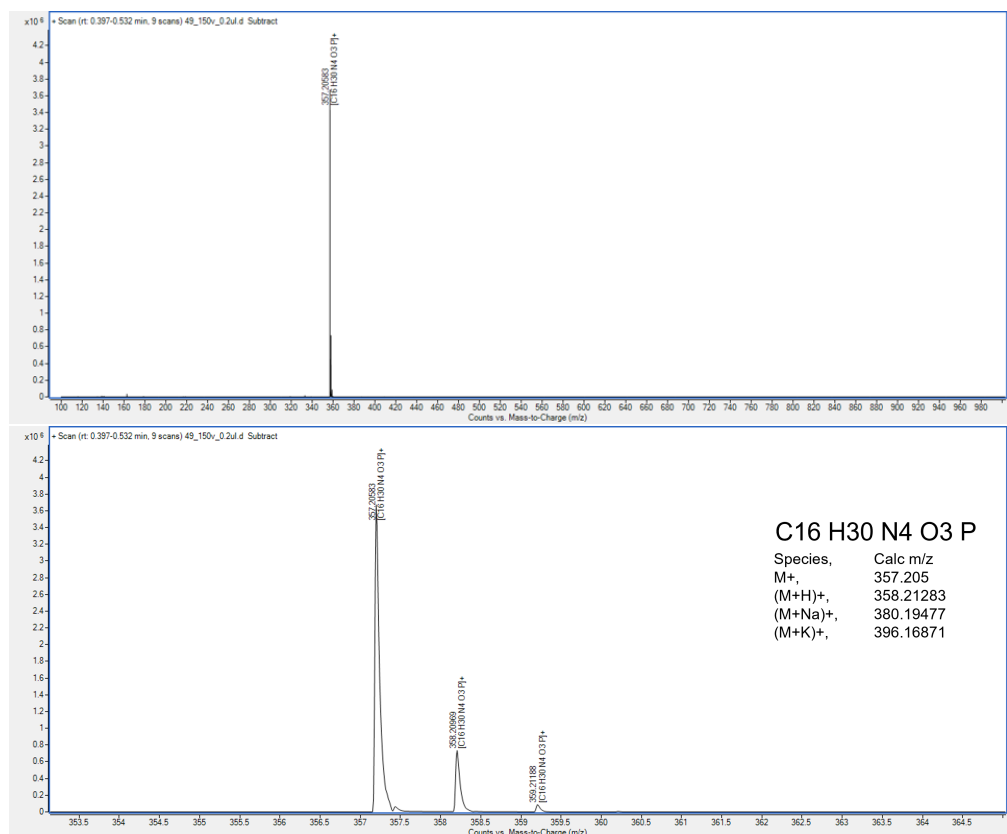

Figure S18: MS spectra of compound **2**.

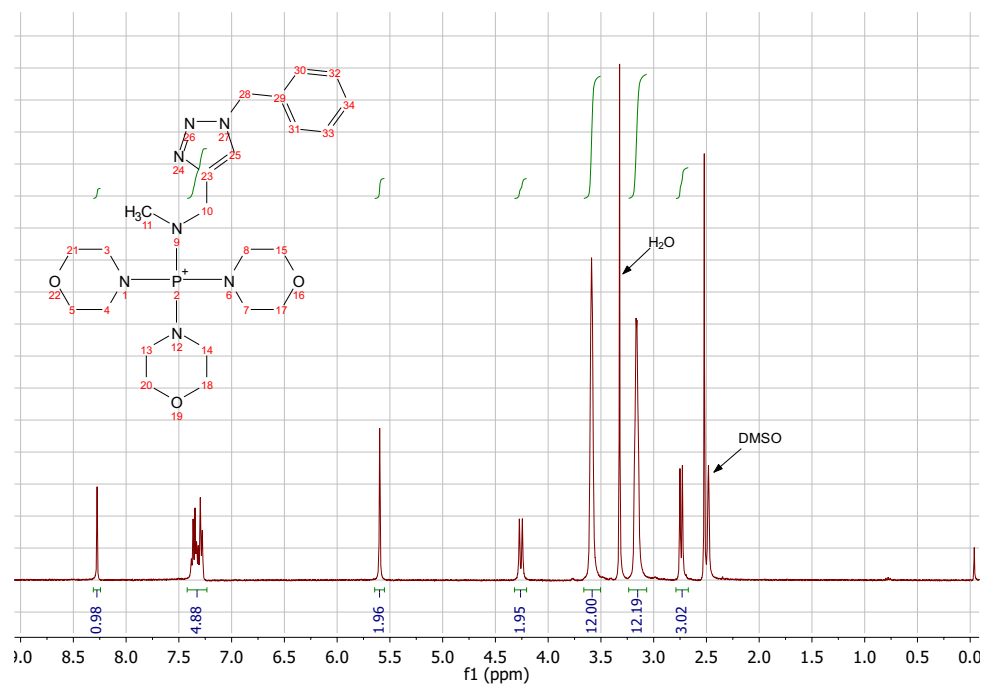

Figure S19: <sup>1</sup>H NMR (400 MHz, DMSO-*d*<sub>6</sub>) spectra of compound **2a**.

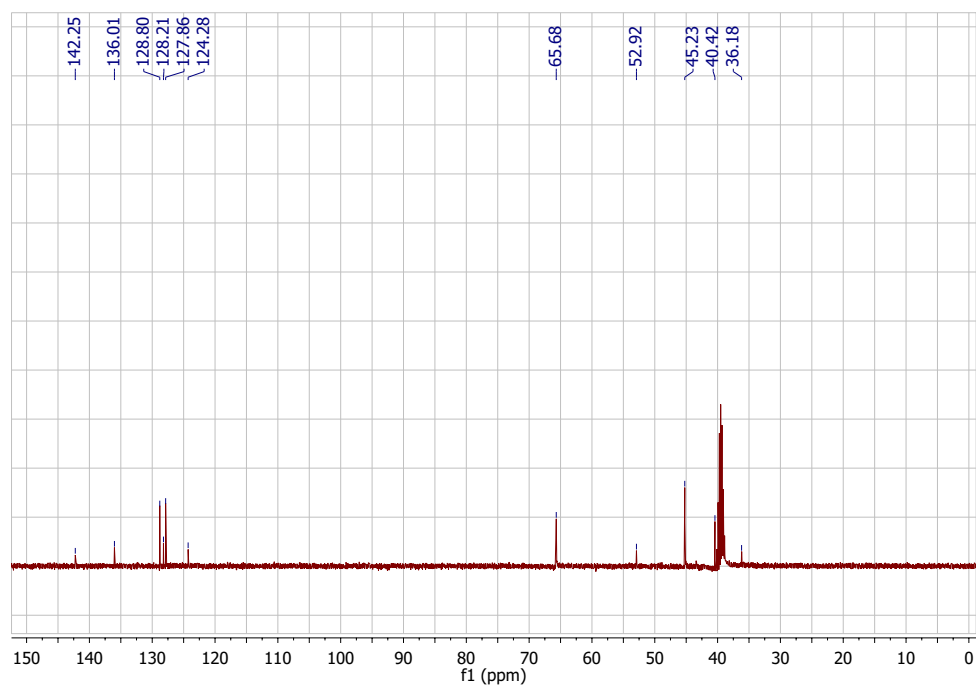

Figure S20: <sup>13</sup>C NMR (101 MHz, DMSO-*d*<sub>6</sub>) spectra of compound **2a**.

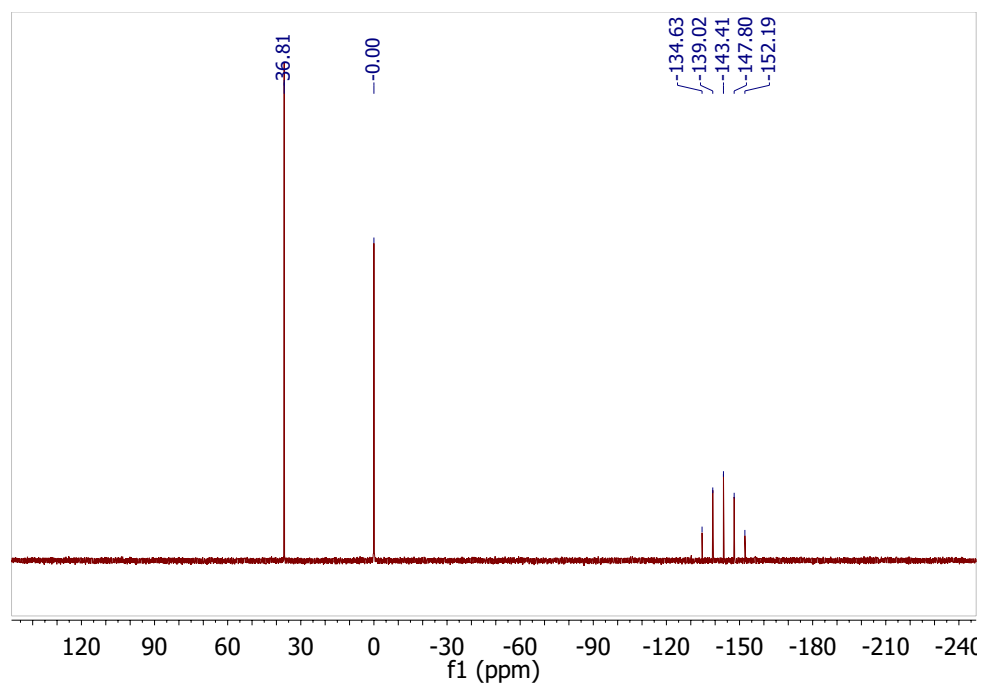

Figure S21: <sup>31</sup>P NMR (162 MHz, DMSO-*d*<sub>6</sub>) spectra of compound **2a**.

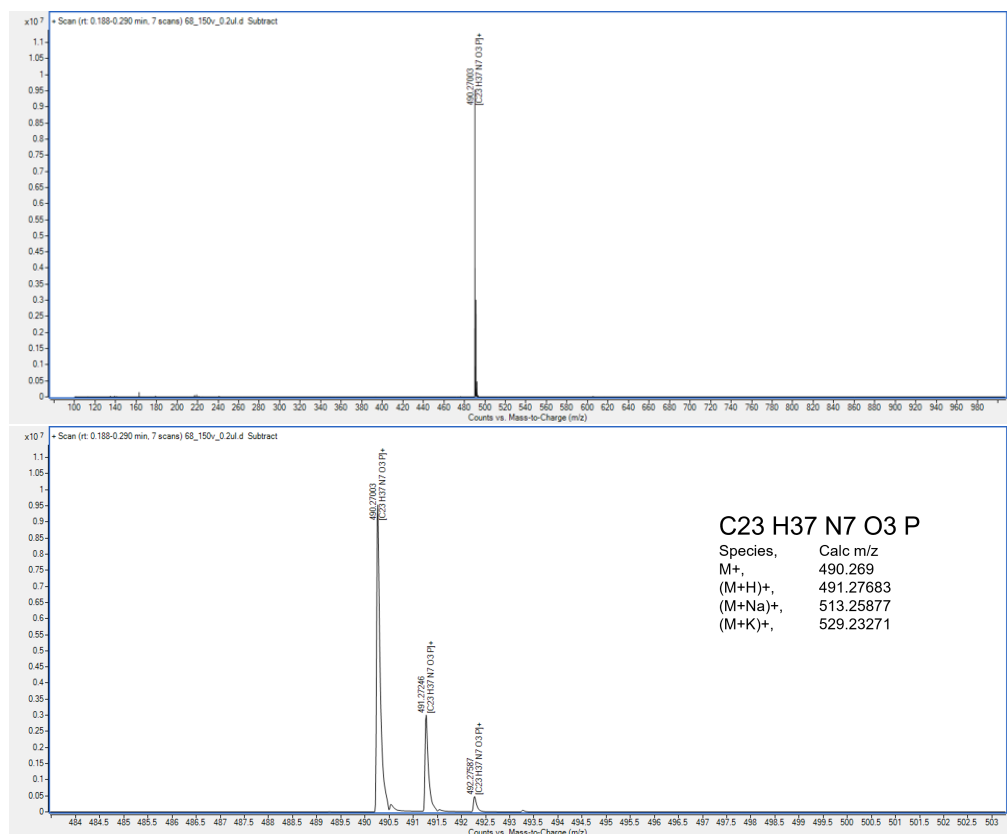

Figure S22: MS spectra of compound **2a**.

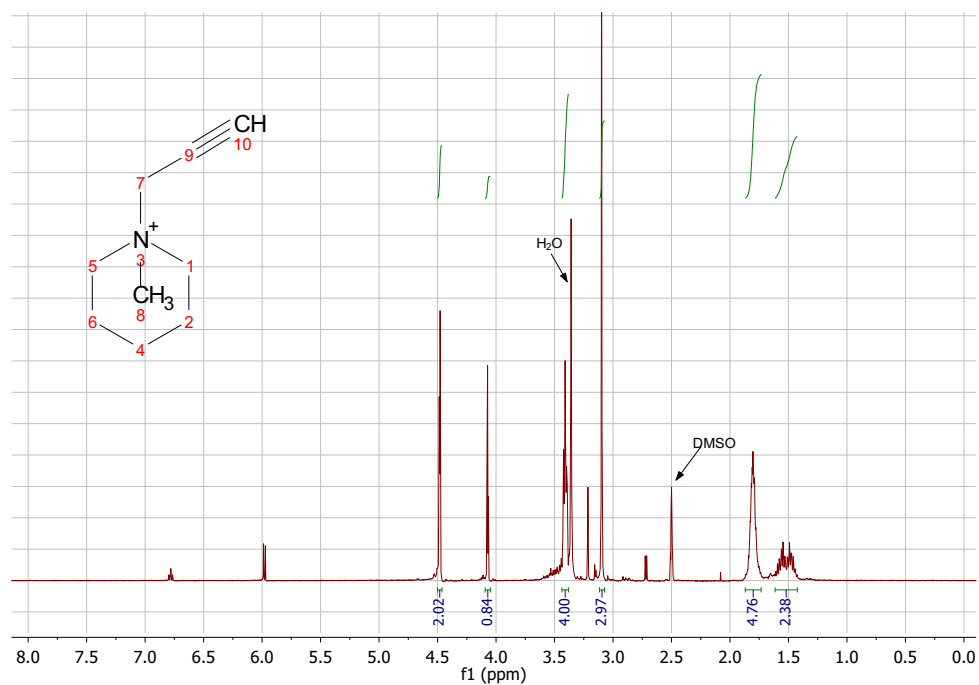

Figure S23: <sup>1</sup>H NMR (400 MHz, DMSO-*d*<sub>6</sub>) spectra of compound **3**.

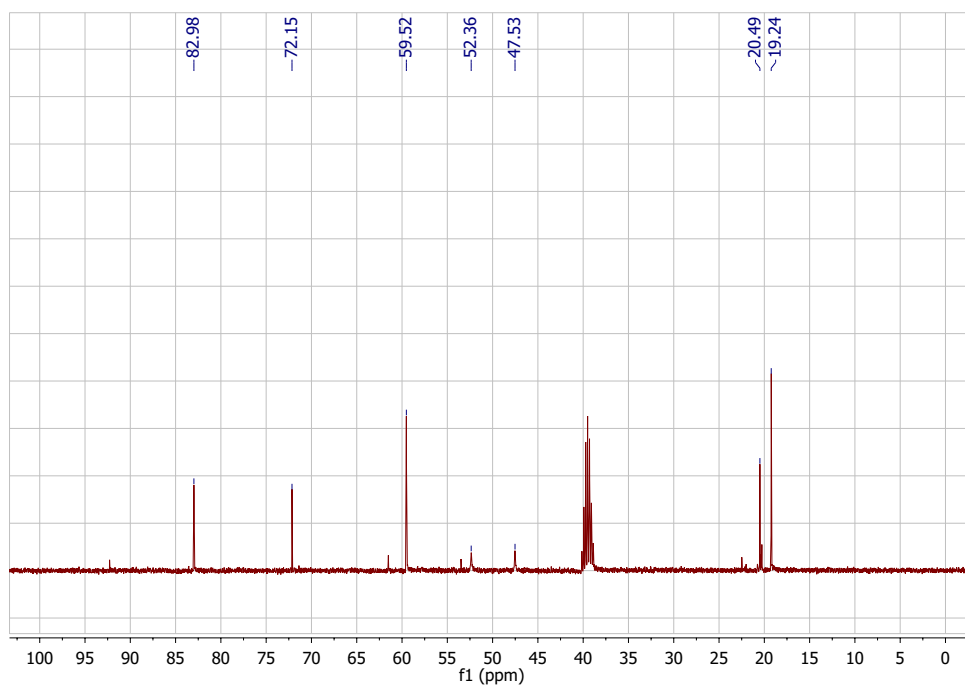

Figure S24: <sup>13</sup>C NMR (101 MHz, DMSO-*d*<sub>6</sub>) spectra of compound **3**.

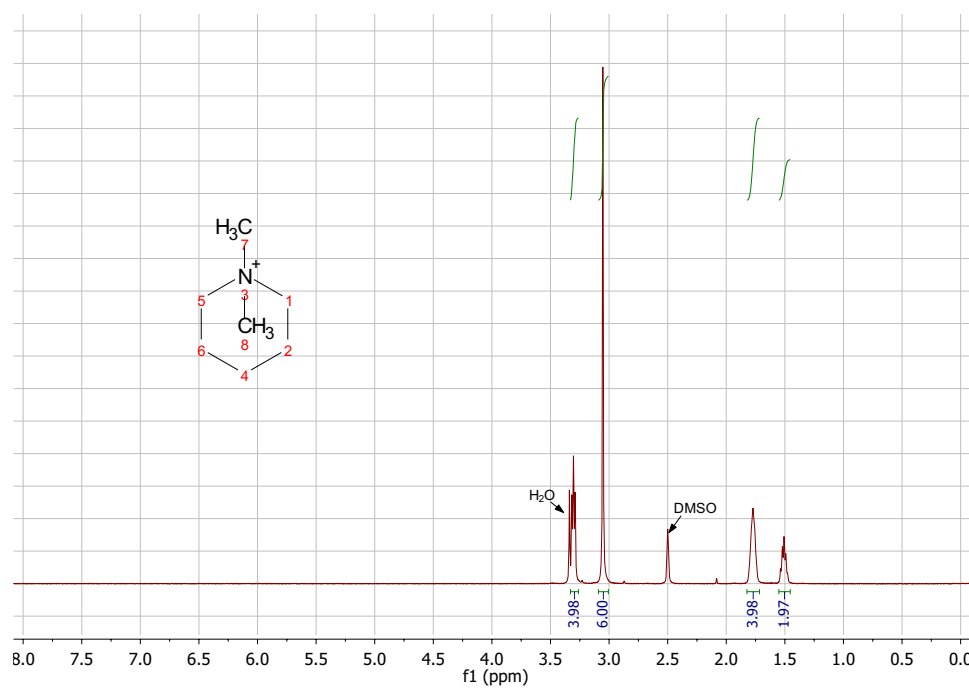

Figure S25: <sup>1</sup>H NMR (400 MHz, DMSO-*d*<sub>6</sub>) spectra of compound **3a**.

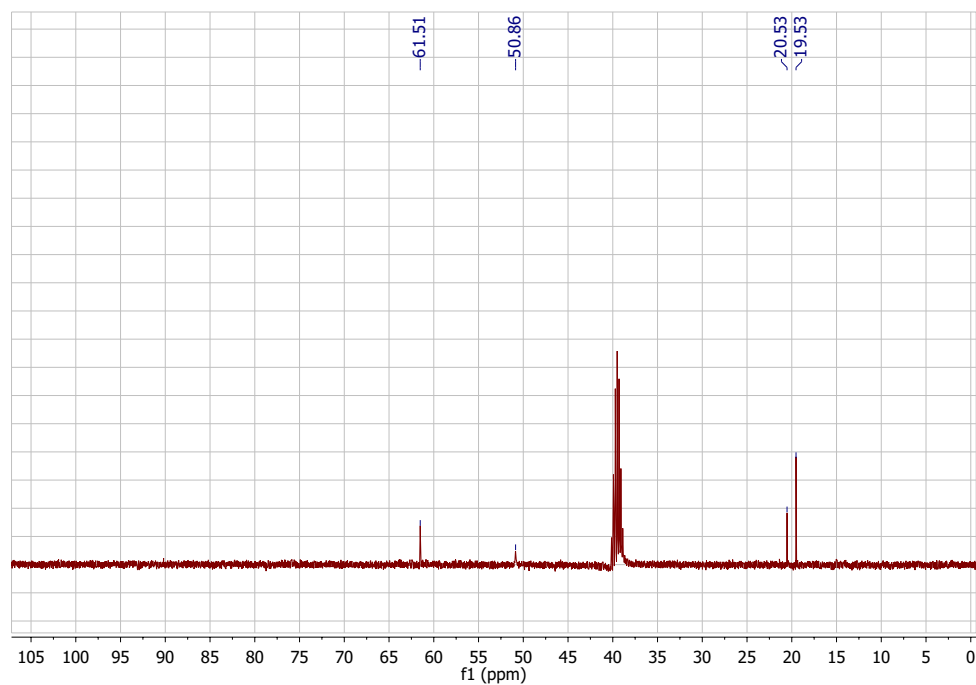

Figure S26:  $^{13}\text{C}$  NMR (101 MHz,  $\text{DMSO}-d_6$ ) spectra of compound **3a**.

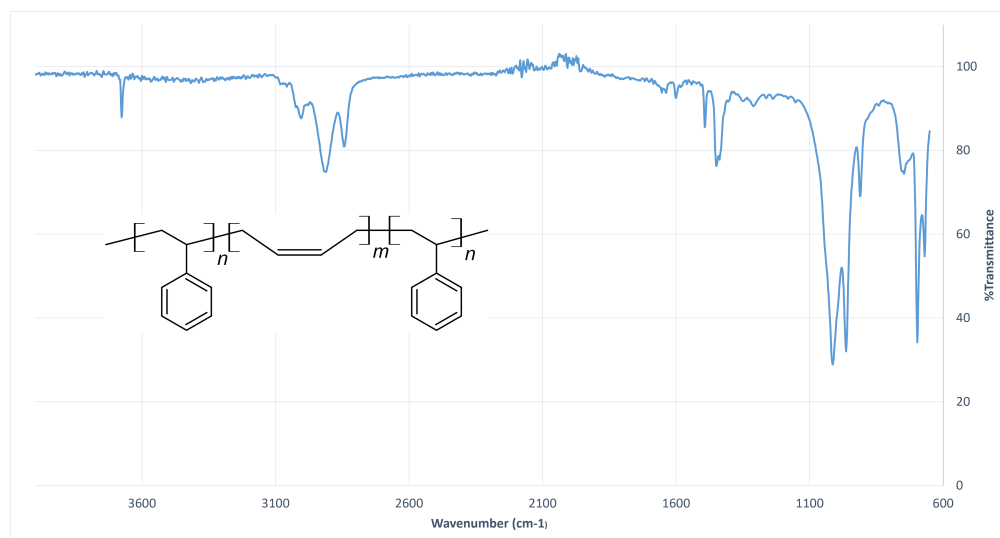

Figure S27: FTIR spectra of SBS.

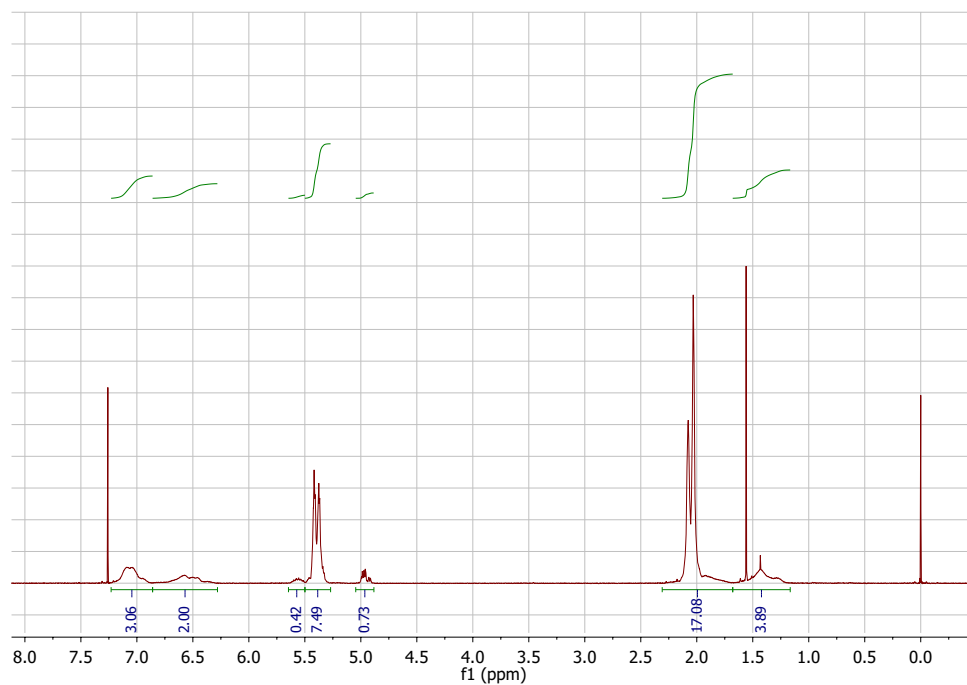

Figure S28: <sup>1</sup>H NMR (400 MHz, CDCl<sub>3</sub>) spectra of SBS.

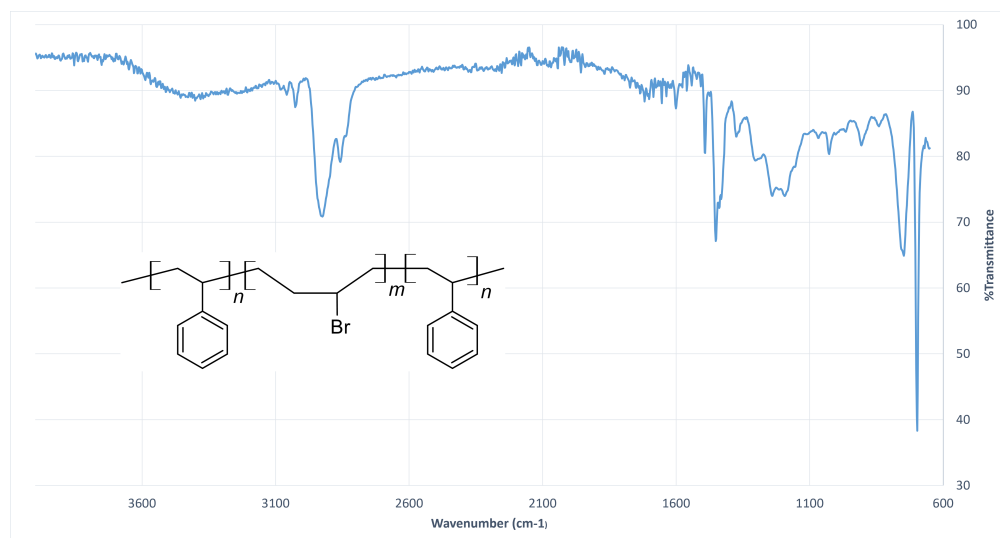

Figure S29: FTIR spectra of SBS-Br.



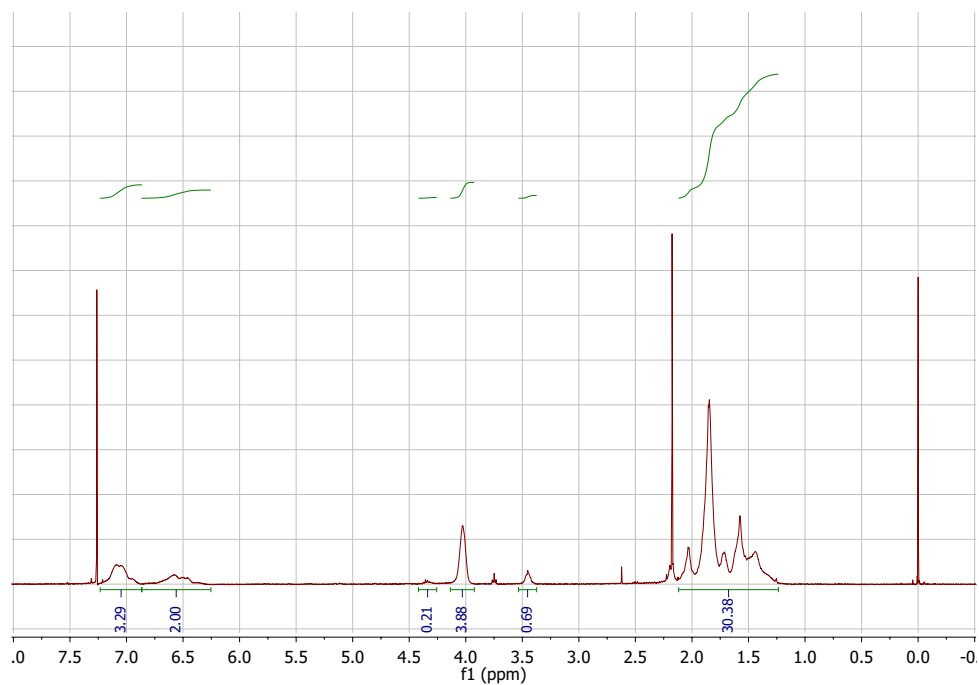

Figure S30:  $^1\text{H}$  NMR (400 MHz,  $\text{CDCl}_3$ ) spectra of SBS-Br.

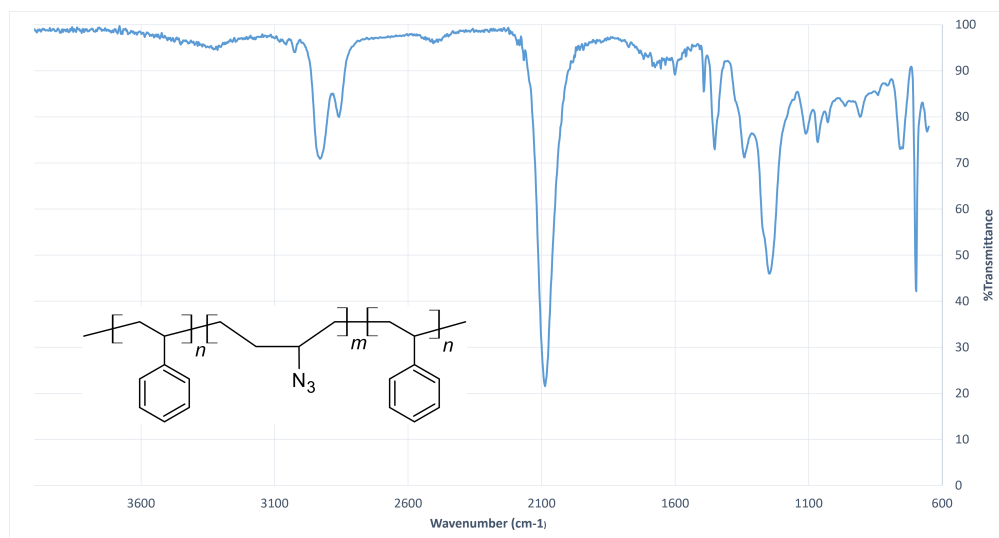

Figure S31: FTIR spectra of SBS-N3.

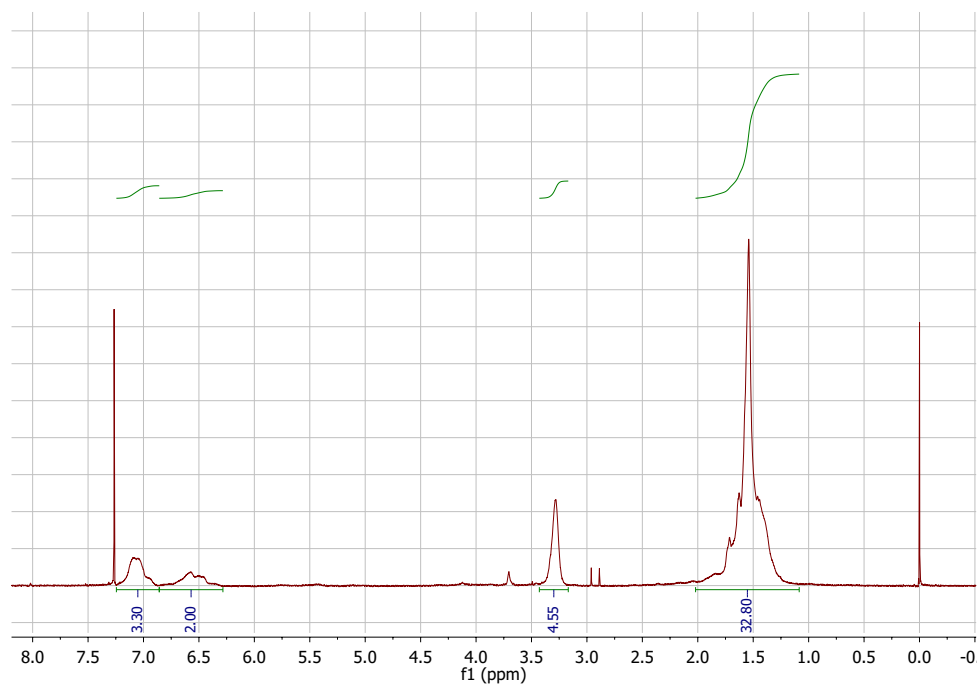

Figure S32:  $^1\text{H}$  NMR (400 MHz,  $\text{CDCl}_3$ ) spectra of SBS-N3.

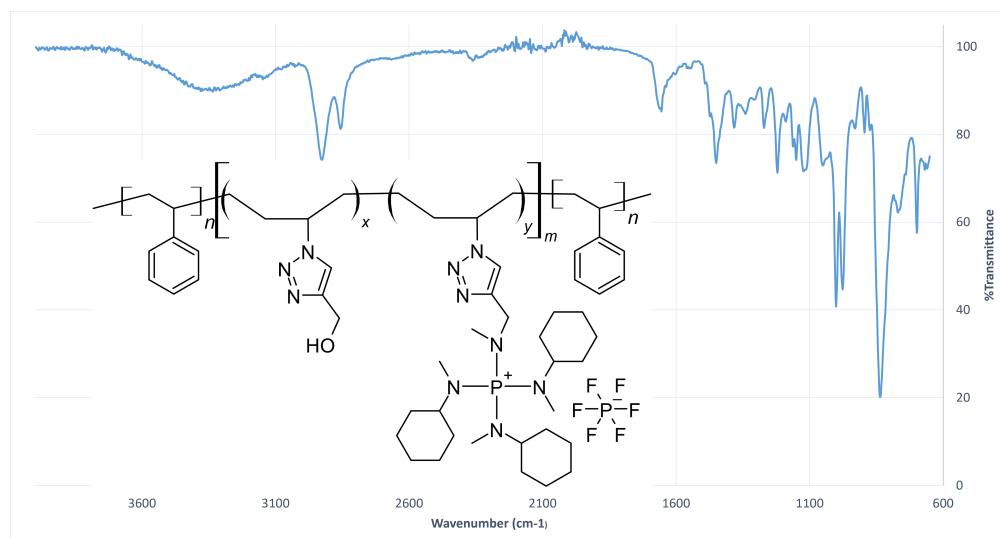

Figure S33: FTIR spectra of polyelectrolyte SBS-c-1A.

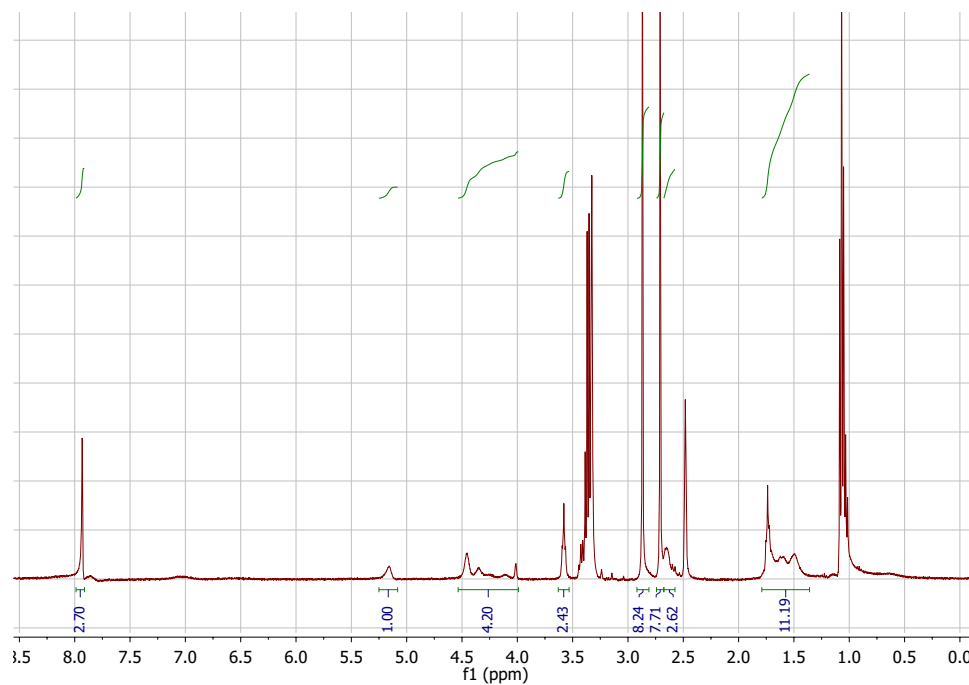

Figure S34:  $^1\text{H}$  NMR (400 MHz,  $\text{DMSO}-d_6$ ) spectra of polyelectrolyte SBS-c-1A.

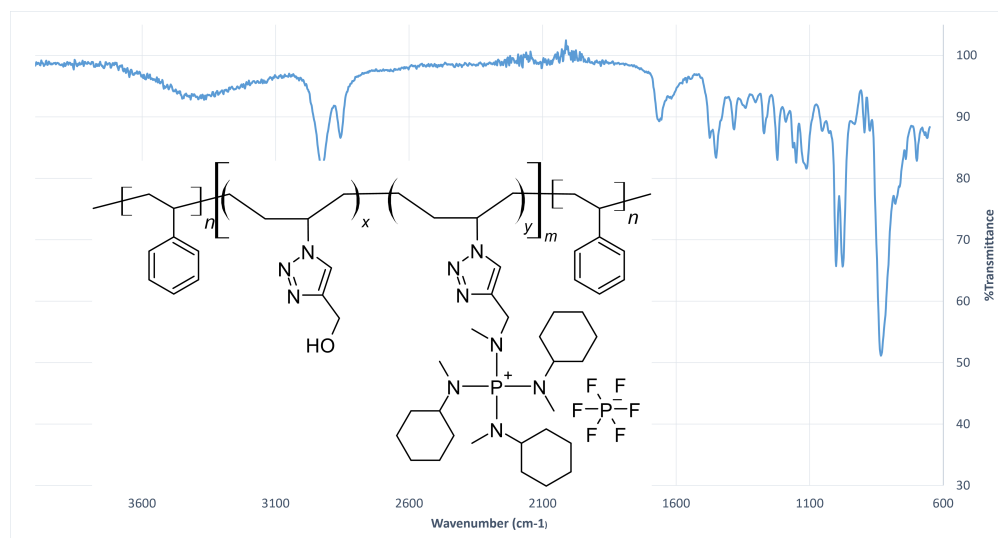

Figure S35: FTIR spectra of polyelectrolyte SBS-c-1B.

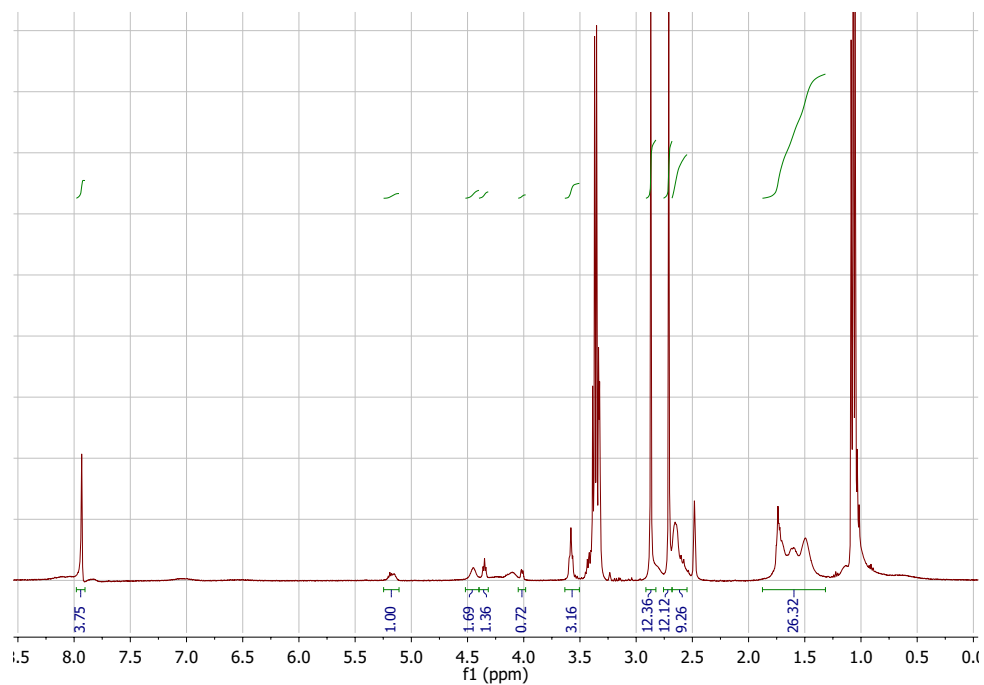

Figure S36:  $^1\text{H}$  NMR (400 MHz,  $\text{DMSO}-d_6$ ) spectra of polyelectrolyte SBS-c-1B.

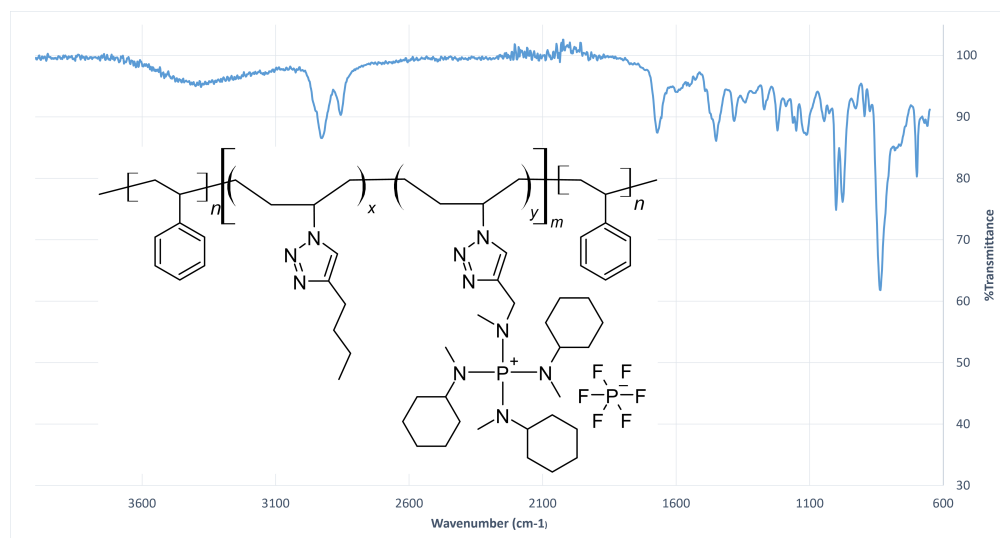

Figure S37: FTIR spectra of polyelectrolyte SBS-c-1C.

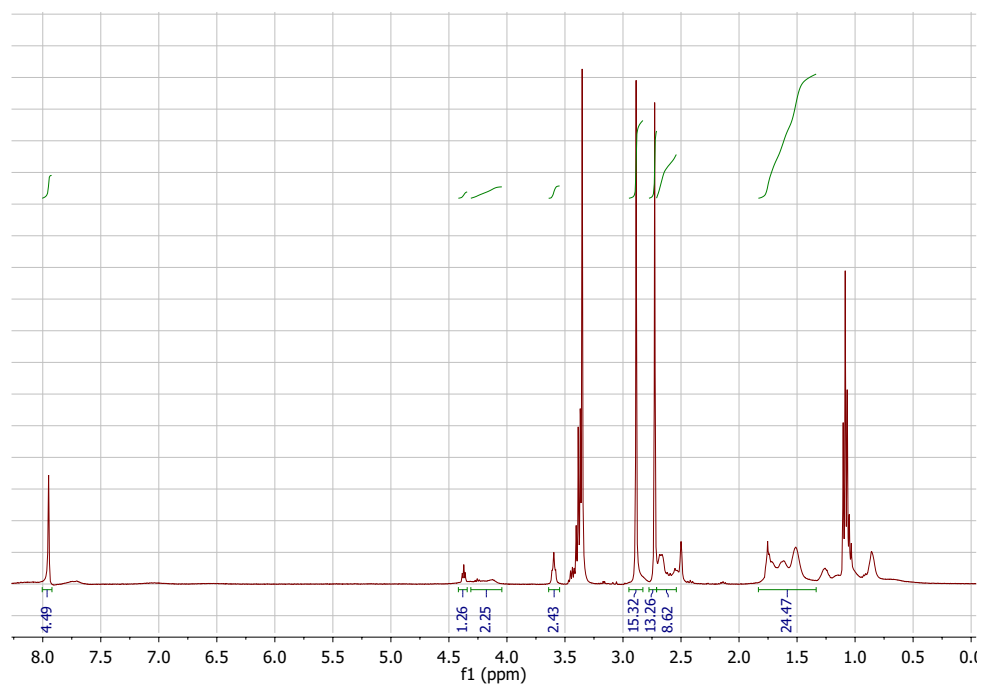

Figure S38:  $^1\text{H}$  NMR (400 MHz,  $\text{DMSO}-d_6$ ) spectra of polyelectrolyte SBS-c-1C.

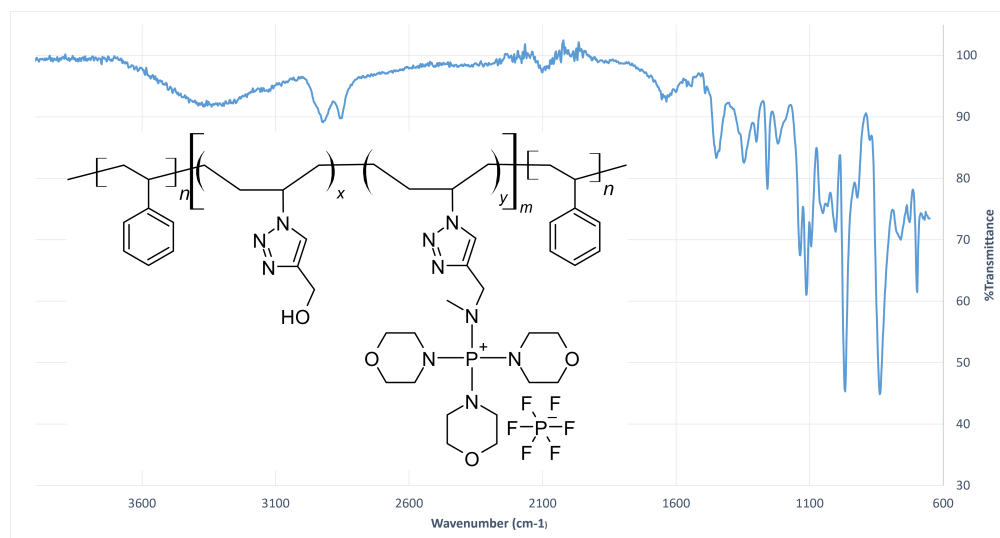

Figure S39: FTIR spectra of polyelectrolyte SBS-c-2A.

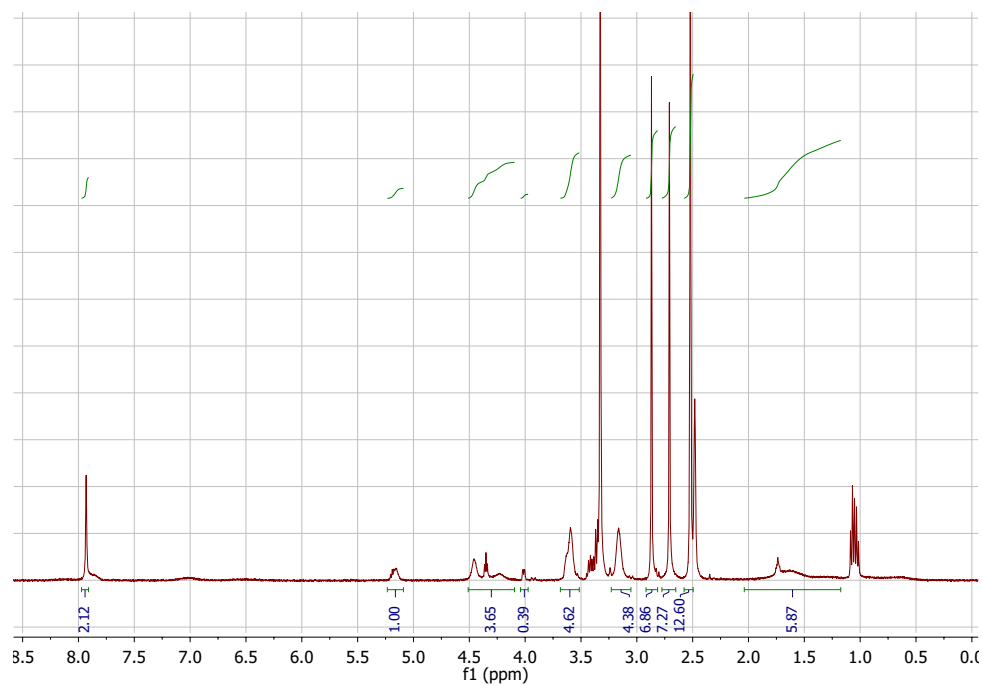

Figure S40:  $^1\text{H}$  NMR (400 MHz,  $\text{DMSO}-d_6$ ) spectra of polyelectrolyte SBS-c-**2A**.

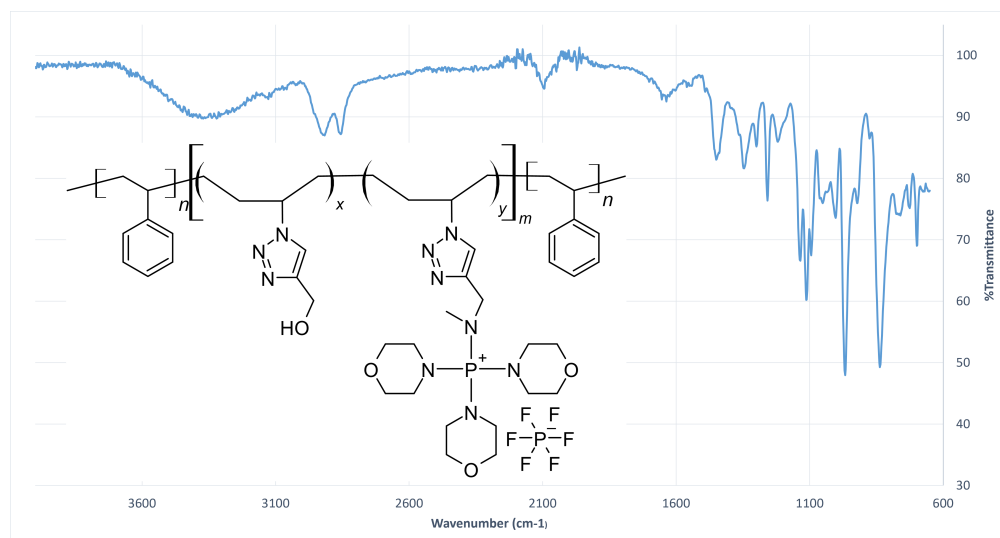

Figure S41: FTIR spectra of polyelectrolyte SBS-c-**2B**.

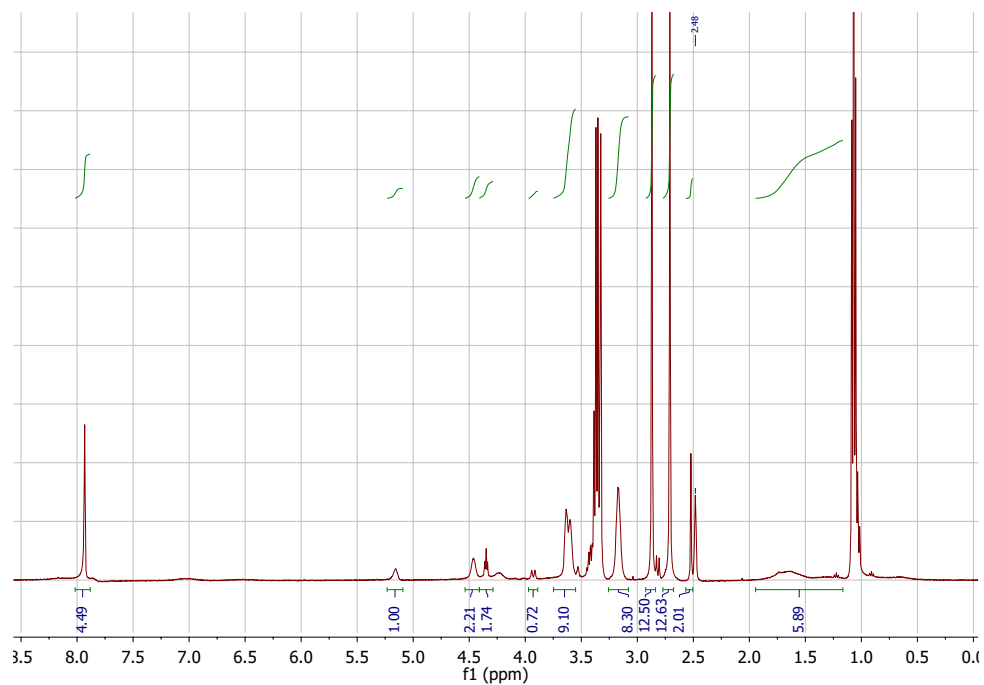

Figure S42:  $^1\text{H}$  NMR (400 MHz,  $\text{DMSO}-d_6$ ) spectra of polyelectrolyte SBS-c-**2B**.

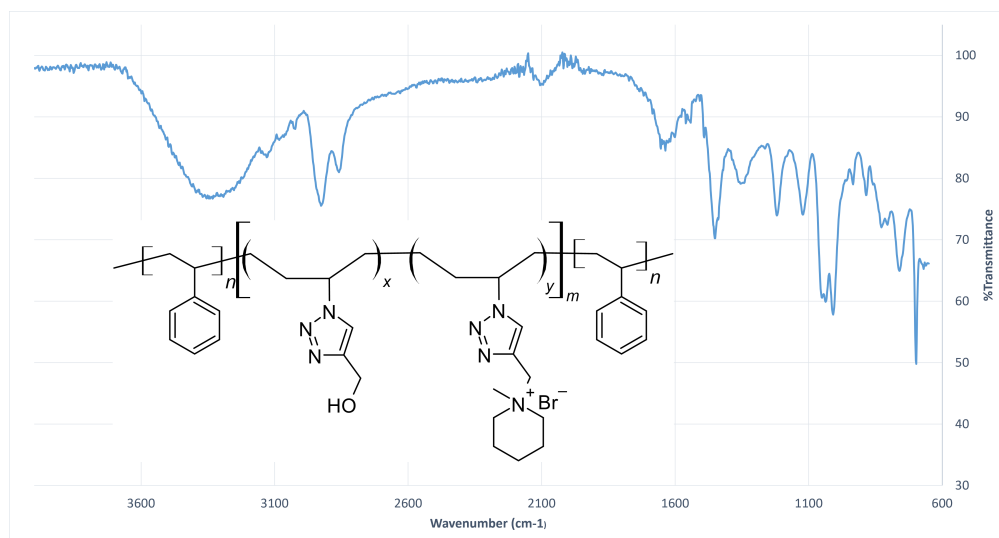

Figure S43: FTIR spectra of polyelectrolyte SBS-c-**3A**.

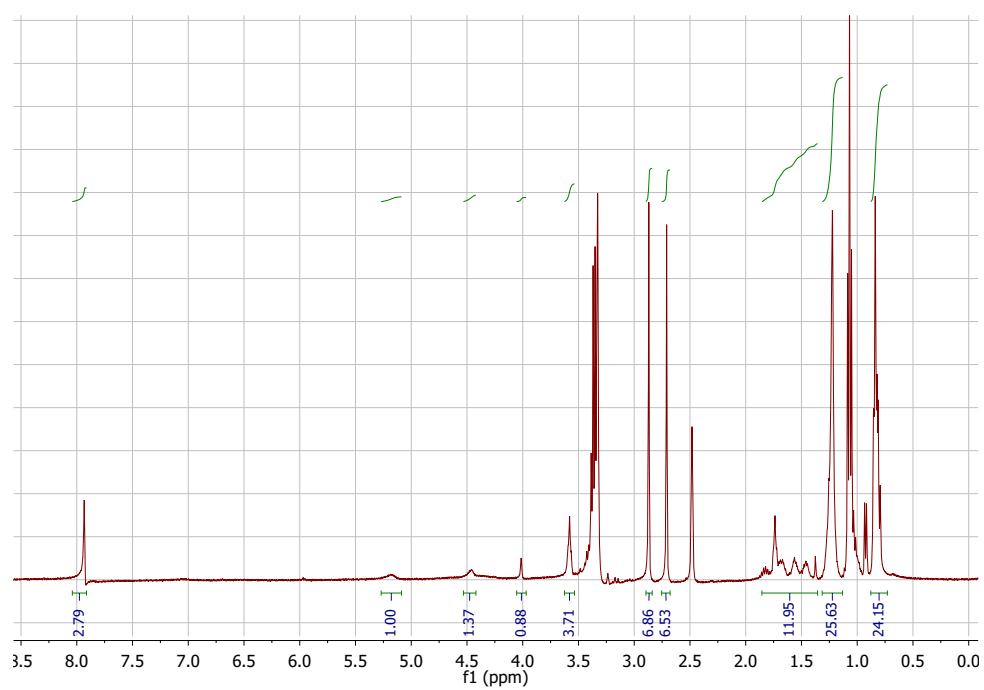

Figure S44:  $^1\text{H}$  NMR (400 MHz,  $\text{DMSO}-d_6$ ) spectra of polyelectrolyte SBS-c-**3A**.



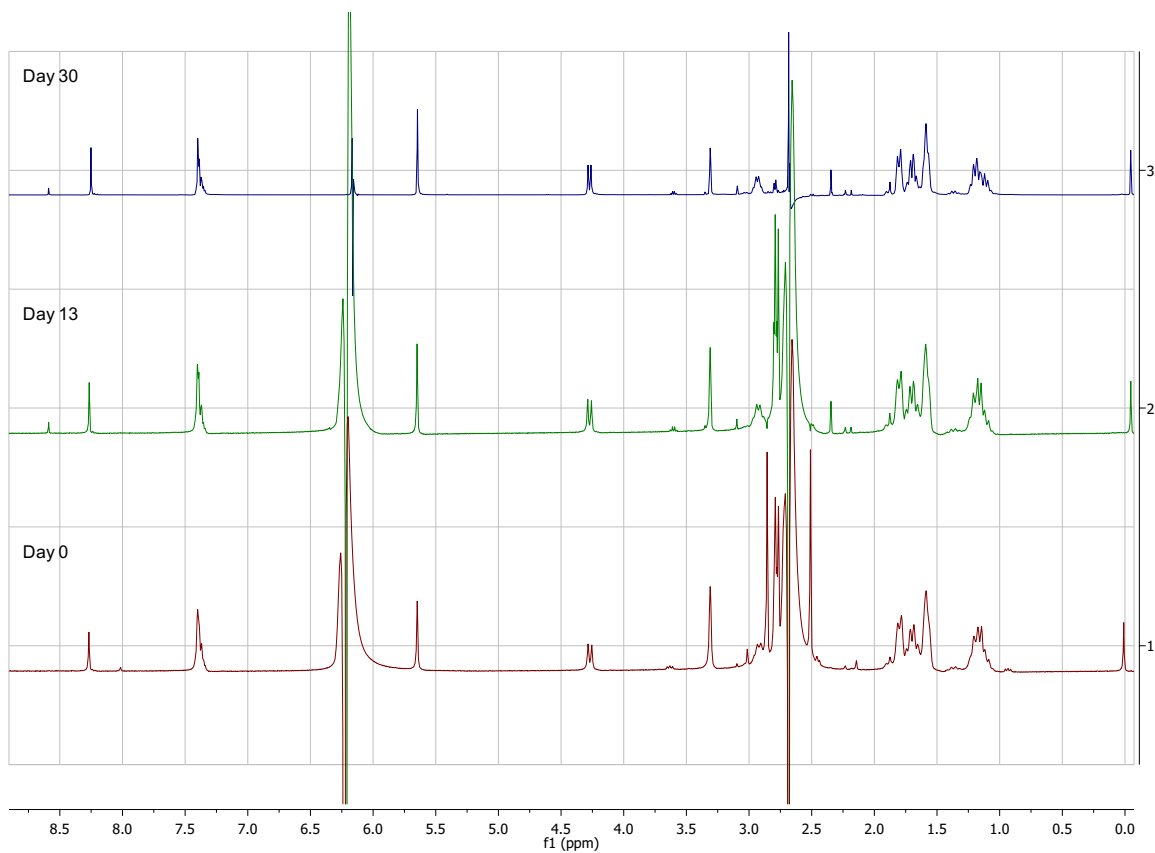

Figure S45:  $^1\text{H}$  NMR (400 MHz,  $\text{CD}_3\text{OH}$ ) spectra of compound **1a** in 2 M KOH over 30 days. There was no observable change indicating the compound was very stable under alkaline conditions.

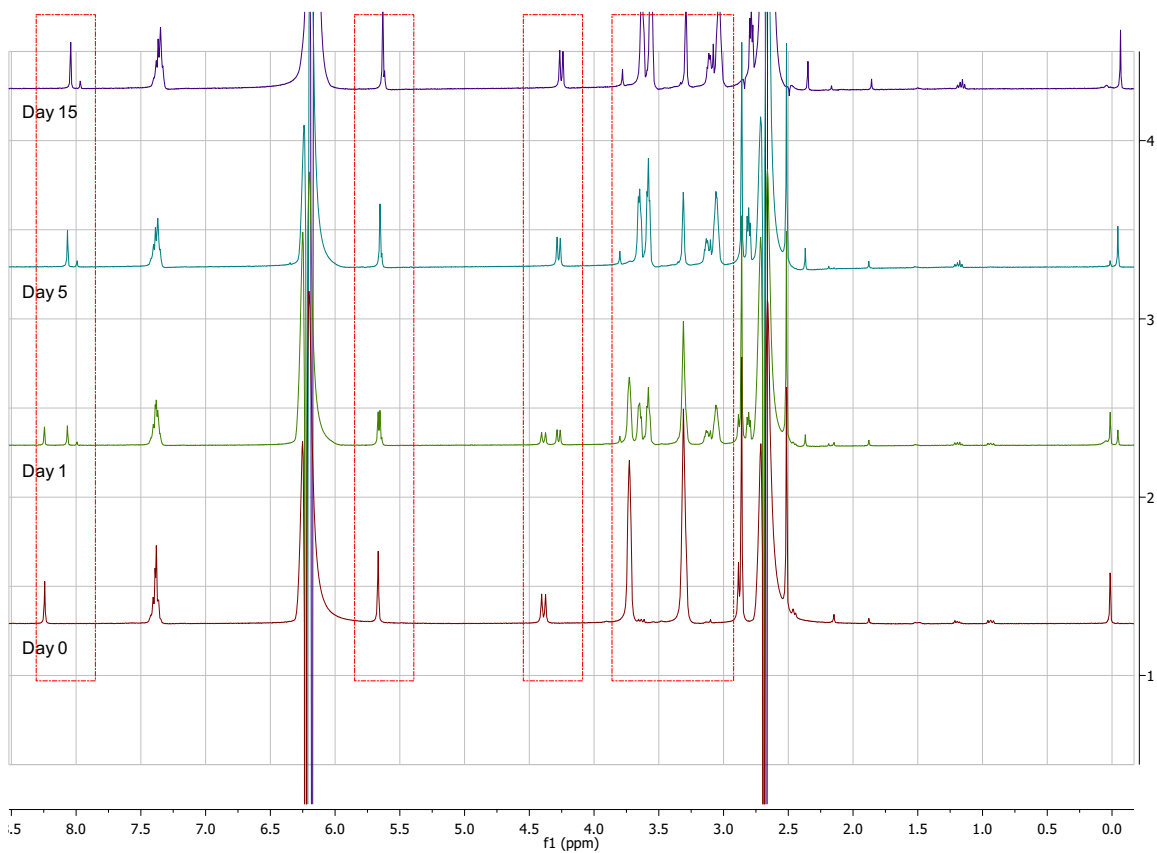

Figure S46:  $^1\text{H}$  NMR (400 MHz,  $\text{CD}_3\text{OH}$ ) spectra of compound **2a** in 2 M KOH over 15 days. Half of the compound degraded within 1 day. Nearly all of the compound degraded in 5 days indicating the compound was very unstable under alkaline conditions.

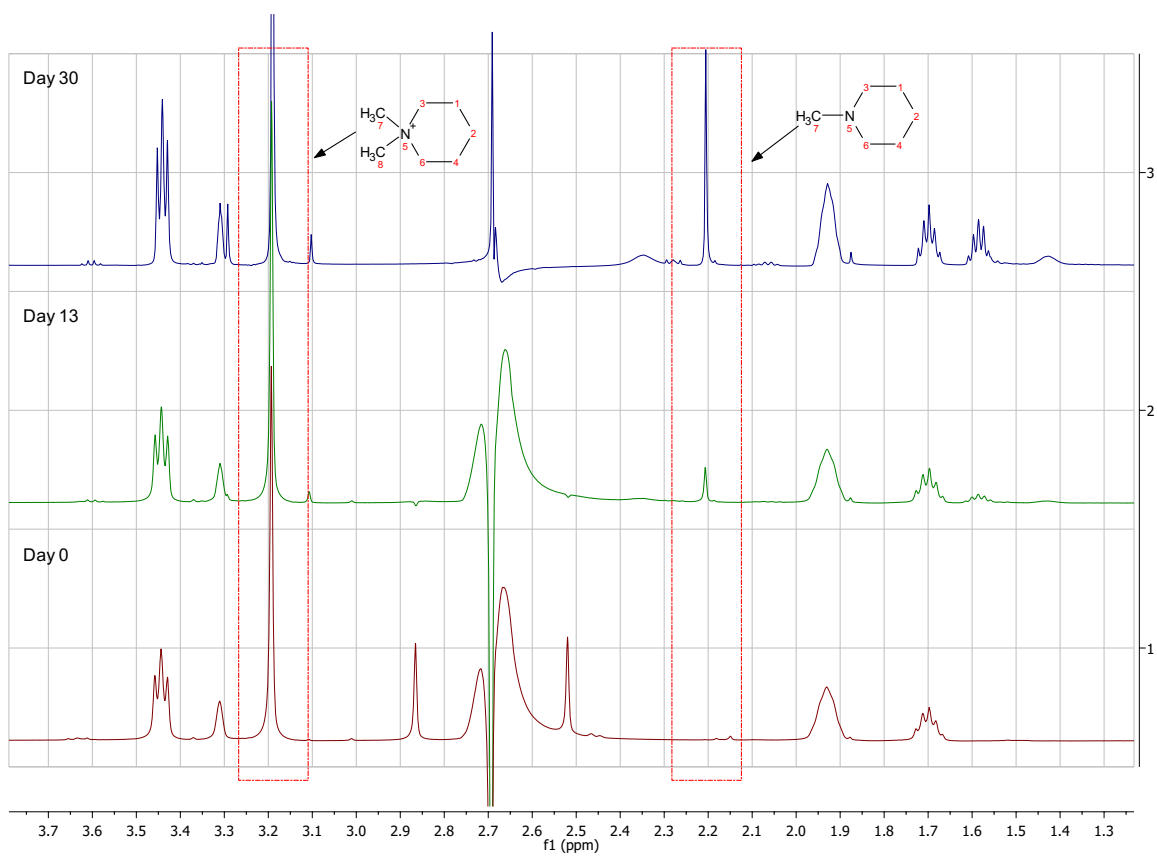

Figure S47:  $^1\text{H}$  NMR (400 MHz,  $\text{CD}_3\text{OH}$ ) spectra of compound **3a** in 2 M KOH over 30 days. About 32% degradation of the compound was observed mainly by demethylation.

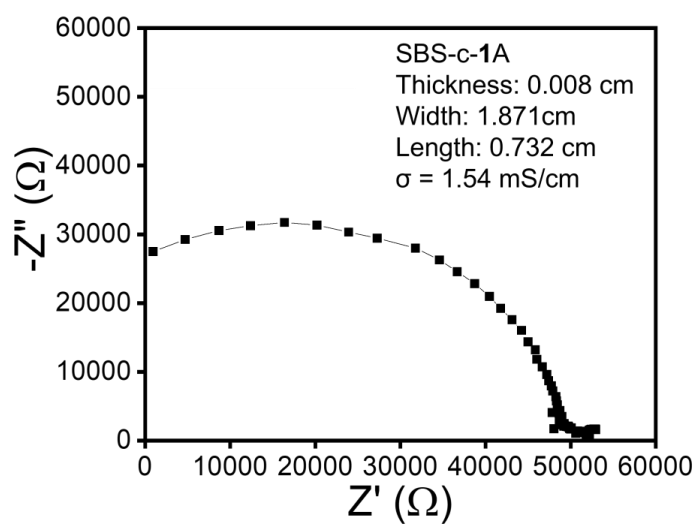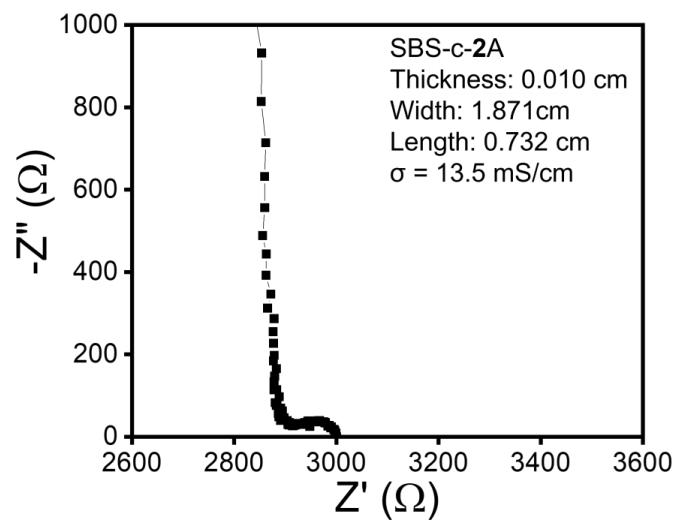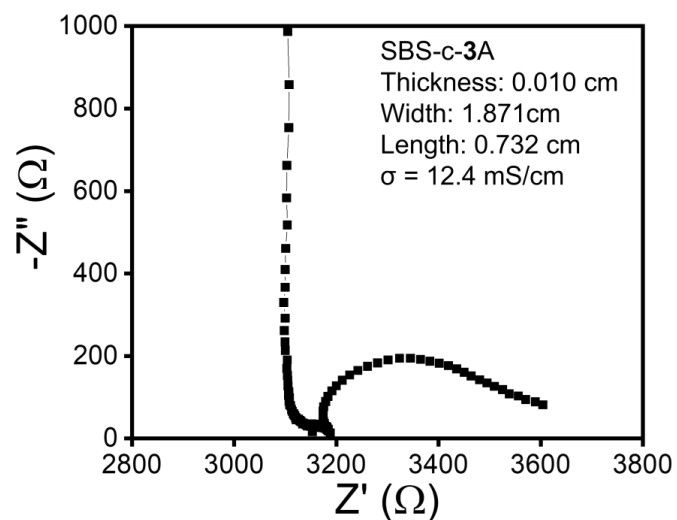

Figure S48: Ionic conductivity of the AEMs.  
 S-28
